1 **Title Page**

2 **Title:** A Systematic Review of Interventions for Prevention and Treatment of Post-Traumatic  
3 Stress Disorder Following Childbirth

4  
5 **List of Authors & Affiliations:**

6 Sharon Dekel, Ph.D.<sup>1,2</sup>, Joanna E. Papadakis, B.S.<sup>2</sup>, Beatrice Quagliarini, M.D.<sup>2</sup>,  
7 Kathleen M. Jagodnik, Ph.D.<sup>1,2</sup>, Rasvitha Nandru, B.S.<sup>2</sup>

8  
9 <sup>1</sup>Department of Psychiatry, Harvard Medical School, Boston, Massachusetts, USA

10 <sup>2</sup>Department of Psychiatry, Massachusetts General Hospital, Boston, Massachusetts, USA

11  
12  
13 **Structured Abstract**

14  
15 *Objective:* Postpartum women can develop post-traumatic stress disorder (PTSD) in response to  
16 complicated, traumatic childbirth; prevalence of these events remains high in the U.S. Currently,  
17 there is no recommended treatment approach in routine peripartum care for preventing maternal  
18 childbirth-related PTSD (CB-PTSD) and lessening its severity. Here, we provide a systematic  
19 review of available clinical trials testing interventions for the prevention and indication of CB-  
20 PTSD.

21  
22 *Data Sources:* We conducted a systematic review of PsycInfo, PsycArticles, PubMed  
23 (MEDLINE), ClinicalTrials.gov, CINAHL, ProQuest, Sociological Abstracts, Google Scholar,  
24 Embase, Web of Science, ScienceDirect, and Scopus through December 2022 to identify clinical  
25 trials involving CB-PTSD prevention and treatment.

26  
27 *Study Eligibility Criteria:* Trials were included if they were interventional, evaluated CB-PTSD  
28 preventive strategies or treatments, and reported outcomes assessing CB-PTSD symptoms.  
29 Duplicate studies, case reports, protocols, active clinical trials, and studies of CB-PTSD following  
30 stillbirth were excluded.

31  
32 *Study Appraisal and Synthesis Methods:* Two independent coders evaluated trials using a modified  
33 Downs and Black methodological quality assessment checklist. Sample characteristics and related  
34 intervention information were extracted via an Excel-based form.

35  
36 *Results:* A total of 33 studies, including 25 randomized controlled trials (RCTs) and 8 non-RCTs,  
37 were included. Trial quality ranged from Poor to Excellent. Trials tested psychological therapies  
38 most often delivered as secondary prevention against CB-PTSD onset (n=21); some examined  
39 primary (n=3) and tertiary (n=9) therapies. Positive treatment effects were found for early  
40 interventions employing conventional trauma-focused therapies, psychological counseling, and  
41 mother-infant dyadic focused strategies. Therapies' utility to aid women with severe acute  
42 traumatic stress symptoms or reduce incidence of CB-PTSD diagnosis is unclear, as is whether  
43 they are effective as tertiary intervention. Educational birth plan-focused interventions during  
44 pregnancy may improve maternal health outcomes, but studies remain scarce.

45  
46 *Conclusions:* An array of early psychological therapies delivered in response to traumatic  
47 childbirth, rather than universally, in the first postpartum days and weeks, may potentially buffer  
48 CB-PTSD development. Rather than one treatment being suitable for all, effective therapy should  
49 consider individual-specific factors. As additional RCTs generate critical information and guide  
50 recommendations for first-line preventive treatments for CB-PTSD, the psychiatric consequences  
51 associated with traumatic childbirth could be lessened.  
52

53 **Keywords:** Antepartum Education, Cesarean Section, Childbirth-related Post-Traumatic Stress  
54 Disorder (CB-PTSD), Childbirth Trauma, Delivery, Eye Movement Desensitization and  
55 Reprocessing (EMDR), Maternal-Infant Attachment, Maternal Morbidity, Maternal Near-Miss,  
56 Obstetric Complications, Obstetrics, Postpartum Period, Post-traumatic Stress Disorder (PTSD),  
57 Preterm, Psychological Counseling, Psychological Debriefing, Psychological Intervention, Skin  
58 to Skin, Trauma-Focused Cognitive Behavioral Therapy, Trauma-Focused Expressive Writing.  
59

60

61 **Disclosure Statement:** The authors report no conflict of interest.

62

63 **Financial Support and Roles of Funding Sources:**

64 Dr. Sharon Dekel was supported by grants from the National Institute of Child Health and Human  
65 Development (R01HD108619, R21HD100817, and R21HD109546) and an ISF award from the  
66 Massachusetts General Hospital Executive Committee on Research. Dr. Kathleen Jagodnik was  
67 supported by a Mortimer B. Zuckerman STEM Leadership Program Postdoctoral Fellowship. Ms.  
68 Joanna Papadakis was supported by a grant through the Menschel Cornell Commitment Public  
69 Service Internship at Cornell University. None of the funding organizations had a role in designing,  
70 conducting, or reporting this work.

71

72 **Information for Systematic Review:**

73 ~ (i) Date of PROSPERO Registration: 07-12-2021

74 ~ (ii) Registration Number: CRD42020207086

75

76

77 **Corresponding Author:**

78 Sharon Dekel, Ph.D.

79 Department of Psychiatry

80 Harvard Medical School & Massachusetts General Hospital, Boston, USA

81 Email: [sdekel@mgh.harvard.edu](mailto:sdekel@mgh.harvard.edu)

82

83

84 **Word Counts**

85 Structured Abstract: 347 words

86 Main Text: 4,965 words

87

88

89

90

91

92

93

94

95

96

97

98 **Main Text**

99 **Introduction**

100 Childbirth is a profound experience often entailing extreme physical and psychological  
101 stress. Among delivering women, an estimated 1/3 experience highly stressful and potentially  
102 traumatic birth,<sup>1-3</sup> and ~60,000 women in the U.S. each year experience severe maternal morbidity  
103 (SMM).<sup>4</sup> SMM rates in the U.S. are among the highest in Western countries<sup>5-7</sup> and steadily  
104 continue to increase.<sup>5,8-10</sup>

105 Complicated deliveries may undermine maternal psychological welfare. Post-traumatic  
106 stress disorder (PTSD) is the formal psychiatric disorder resulting from exposure to an event  
107 involving life-threat or physical harm and associated psychological symptoms that do not resolve  
108 naturally over time.<sup>11</sup> Existing research supports the validity of PTSD following childbirth, or  
109 childbirth-related PTSD (CB-PTSD).<sup>12</sup> The prevalence of this condition is estimated at 5-6% of  
110 all postpartum women;<sup>3,13,14</sup> this translates nationally to 240,000 affected American women each  
111 year. In complicated deliveries, 18.5% to 41.2% of women<sup>14-16</sup> report CB-PTSD symptoms. Black  
112 and Latinx women are nearly three times more likely to endorse a childbirth-related traumatic  
113 stress response.<sup>17</sup>

114 Although highly co-morbid with peripartum depression,<sup>18-20</sup> CB-PTSD is a distinct  
115 condition largely consistent with the formal symptom constellation of PTSD.<sup>21</sup> Exposure to a  
116 traumatic childbirth can result in childbirth-related involuntary intrusion symptoms such as  
117 flashbacks and nightmares; attempts to avoid reminders of childbirth; negative alterations in  
118 cognitions and mood, and marked arousal and reactivity manifested in irritability, sleep and  
119 concentration problems, hypervigilance, and other symptoms.<sup>22-24</sup>

120           When left untreated, CB-PTSD can impair maternal functioning during the important  
121 postpartum period. Women with CB-PTSD may exhibit reduced maternal affection, bonding, and  
122 sensitive behavior toward their infant,<sup>25-28</sup> which may increase the risk for social and emotional  
123 developmental problems in the infant.<sup>27,29</sup> Available research suggests that maternal CB-PTSD  
124 associates with infant behavioral problems, as well as sleep and feeding problems, including less  
125 favorable breastfeeding outcomes.<sup>29</sup> Untreated CB-PTSD can also result in avoidance of partner  
126 intimacy and disincentivize future pregnancies.<sup>30-32</sup>

127           CB-PTSD has unique attributes that support the potential for early intervention and even  
128 prevention. PTSD symptoms begin after a specified external traumatic event (here, childbirth) and  
129 appear in the first days following exposure,<sup>18,33,34</sup> suggesting that CB-PTSD follows a clear onset.  
130 Theoretical models of non-childbirth PTSD pathogenesis suggest that beyond pre-existing  
131 vulnerabilities, biological and psychological mechanisms underlie an individual's immediate  
132 response to a traumatic event that could be targeted by interventions to buffer and avert the PTSD  
133 trajectory.<sup>35-38</sup> Consequently, early interventions could produce favorable outcomes. Unlike other  
134 forms of trauma, childbirth is a relatively time-defined event for which women often stay in the  
135 hospital after parturition. This suggests an important opportunity to identify and treat women  
136 before they develop the full traumatic stress syndrome.

137           Presently, there is a critical gap in knowledge to inform recommendations to prevent and  
138 treat CB-PTSD. Early review studies on this topic used the limited number of available clinical  
139 trials, preventing firm conclusions about the utility of psychological debriefing and individual  
140 counseling therapies.<sup>39-41</sup> In recent years, 6 systematic reviews have been performed that focused  
141 mostly on early interventions; they included 45 trials published up to 2022.<sup>42-47</sup> The reviews  
142 concluded that early-administered trauma-focused interventions that work through exposure and

143 reprocessing of the traumatic memory and related cognitions appear helpful for alleviating  
144 symptoms of CB-PTSD in the short term, but that more studies were warranted to establish clinical  
145 recommendations.

## 146 **Objectives**

147 We provide a comprehensive systematic review of randomized and non-randomized  
148 controlled clinical trials for preventing CB-PTSD onset or reducing symptoms severity in affected  
149 women. We used a quantitative rating system to evaluate the published trials' quality.<sup>48</sup> To the best  
150 of our knowledge, this approach has not previously been implemented. We reviewed the potential  
151 benefits of primary, secondary, and tertiary prevention approaches for CB-PTSD to provide insight  
152 into which therapies are most promising, what the optimal timing for intervention may be, and  
153 which populations will benefit most from these interventions. Publication dates range from  
154 December 1998 to December 2022.

155

## 156 **Methods**

### 157 *a. Eligibility Criteria, Information Sources and Search Strategy*

158 To be included in this review, studies were independently evaluated based on the following  
159 inclusion criteria: a) interventional study; b) indication of CB-PTSD prevention or treatment; and  
160 c) inclusion of outcome measure(s) assessing CB-PTSD symptoms or diagnosis. Duplicate studies,  
161 case reports, study protocols, active clinical trials, and studies involving mothers who exclusively  
162 experienced stillbirth were excluded.

163 This systematic review was conducted according to PRISMA guidelines,<sup>49</sup> and our  
164 protocol is registered on PROSPERO (CRD42020207086). Our search strategy targeted all  
165 published studies measuring CB-PTSD or its symptoms as a primary treatment outcome. Articles

166 published through December 2022 were included from the following databases: PsycInfo,  
167 PsycArticles, PubMed (MEDLINE), ClinicalTrials.gov, CINAHL, ProQuest, Sociological  
168 Abstracts, Google Scholar, Embase, Web of Science, ScienceDirect, and Scopus. The search  
169 criteria employed any combination of these keywords: "Postpartum OR postnatal OR childbirth  
170 PTSD" OR "traumatic childbirth" OR "childbirth induced post-traumatic stress" AND "treatment  
171 OR intervention OR therapy OR prevention". Published reviews on CB-PTSD therapies served as  
172 additional resources.

173 *b. Study Selection*

174 A total of 33 studies published from December 1998 to December 2022 met inclusion  
175 criteria and were reviewed. This selection followed the PRISMA workflow process;<sup>49</sup> for more  
176 information regarding study selection, see Figure 1.

177

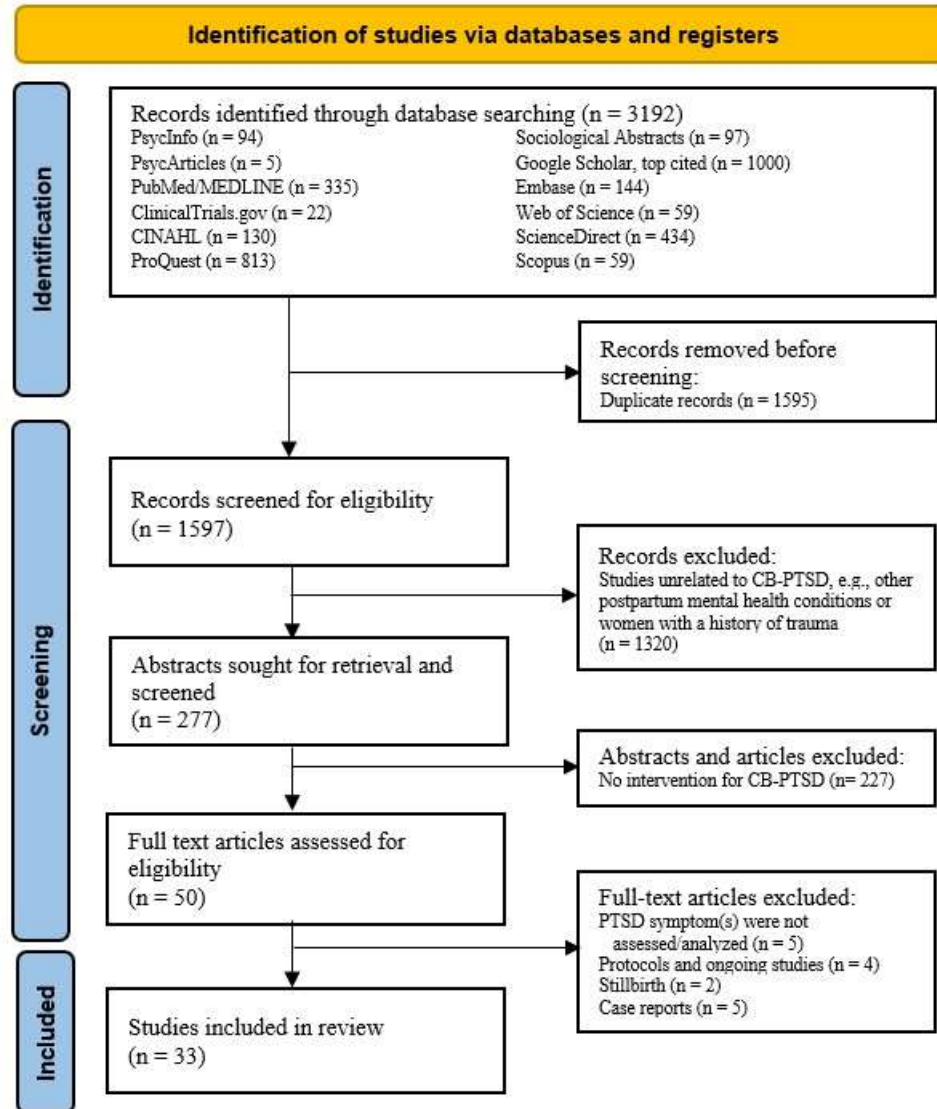

178

179

180 Figure 1. PRISMA flow diagram detailing the source selection process of both randomized and  
181 non-randomized clinical studies targeting childbirth-related post-traumatic stress disorder (CB-  
182 PTSD) in at-risk and universal samples.

183

184

185

186

187



188 *c. Data Extraction*

189 Two reviewers (J.P. and R.N.) extracted data using an Excel-based form. For each study,  
190 the reviewers collected: sample characteristics, treatment type (prevention/treatment) and  
191 modality, intervention frequency/duration, primary outcome measures, and outcome time points  
192 (immediate, moderate, and long-term). We report treatment effects on CB-PTSD symptoms and  
193 related conditions. Details are presented in Table 1.

194

195 [Insert Table 1 here]

196 Table 1 is available as a separate figure.

197 Table 1. Descriptions of clinical trials for interventions to prevent or treat childbirth-related  
198 maternal PTSD

199

200 *d. Assessment of Risk of Bias, and Quality Assessment*

201 We adopted the well-validated, commonly used Downs and Black checklist<sup>48</sup> that is  
202 recommended for evaluating the quality of randomized and non-randomized healthcare  
203 interventions. This 27-item checklist offers a quantitative rating scale that is a composite  
204 measurement of external validity, internal validity/confounding bias, and statistical power.  
205 Individual items are scored on an integer scale of 0 to 1, for a total score of 28 (with item 5 scored  
206 0-2). A study's overall quality score is calculated using the checklist's assigned point system, with  
207 higher score indicating higher study quality. In this review, to better identify high-quality trials,  
208 items 20, 21, and 27 ("Were the main outcome measures used accurate?"; "Were the patients in  
209 different intervention groups or were the cases and controls recruited from the same population?";  
210 "Were study subjects randomized to intervention groups?", respectively) were scored on a 0-2 scale,

211 as done in previous studies,<sup>50-52</sup> with a maximum total score of 31. Modified quality score ranges  
212 were specified as: Excellent (29-31); Good (22-28); Fair (17-21); Poor ( $\leq 16$ ).

213 The two reviewers independently scored all 33 studies. Inter-rater reliability was high  
214 (91%), and any discrepancy in scores was discussed until 100% agreement was achieved. The  
215 quality scores and adopted checklist are presented in Table 1 and Appendix A, respectively.

216

## 217 **Results**

### 218 *a. Study Selection*

219 In this review of 33 studies, 25 were randomized controlled trials (RCTs) and 8 were non-  
220 RCTs. Among all trials, 3 tested primary preventive interventions delivered during pregnancy; 19  
221 tested secondary preventions in which treatment was provided after childbirth but not later than 1  
222 month postpartum, i.e., before a DSM PTSD diagnosis can be confirmed;<sup>11</sup> and 11 trials involved  
223 tertiary prevention delivered more than 1 month postpartum, in cases with confirmed or probable  
224 CB-PTSD.

225 Of the 33 studies, 31 entailed psychologically oriented therapies. These included trauma-  
226 focused structured and non-structured interventions (n=19), i.e., psychological debriefing, crisis  
227 intervention, Trauma-Focused Cognitive Behavioral Therapy (TF-CBT), Eye Movement  
228 Desensitization and Reprocessing (EMDR), and Trauma-Focused Expressive Writing (TF-EW);  
229 mother-infant dyad therapies (n=3); psychological counseling (n=5); and other psychological  
230 approaches, i.e., visual biofeedback (n=1) and visual spatial cognitive task (n=2). The remaining  
231 3 trials were educational interventions (Table 1).

232 In most trials, treatment response was determined using validated patient self-administered  
233 questionnaires to measure endorsement of CB-PTSD symptoms (n=30). Clinician evaluation to

234 determine CB-PTSD endorsement was performed in 3 trials. Assessment of sustained treatment  
235 outcomes usually targeted the first months following the intervention (n=27,  $\geq 1.5$  months,  $\leq 6$   
236 months); longer effects ( $\geq 12$  months post-intervention) were measured in 6 trials.

237

### 238 *b. Study Characteristics and Risk of Bias Results*

239 Detailed information on the study characteristics and quality assessment results are  
240 presented in Table 1.

### 241 *c. Synthesis of Results*

#### 242 *Psychologically Oriented*

#### 243 *Debriefing or Trauma-Focused Psychological Therapies (TFPT)*

244 Psychological debriefing in the postpartum is usually performed as an early intervention  
245 via midwife-led dialogue involving delivery-related emotions.<sup>44,53,54</sup> When treating CB-PTSD, the  
246 stressful aspects of the childbirth experience are addressed. Debriefing was tested in 4 RCTs as  
247 early secondary prevention and 1 NRCT as later (tertiary) prevention. Quality scores ranged from  
248 Fair to Good (17-28).

249 Overall, although women generally consider debriefing of value, no evidence supports the  
250 psychological benefit of midwife-led postpartum debriefing following healthy<sup>55,56</sup> or  
251 complicated<sup>57,58</sup> deliveries. A single structured 15-60 minute debriefing session within 72 hours  
252 post-delivery vs. treatment as usual (TAU) was not associated with reduction in traumatic stress,  
253 depression,<sup>55,56</sup> anxiety, or parenting distress,<sup>55</sup> nor the proportion of incidences meeting CB-PTSD  
254 diagnosis.<sup>56</sup> A sub-group of women receiving debriefing who experienced more medical  
255 interventions had *more* negative perceptions of childbirth than controls.<sup>55</sup> Similarly, no sustained

256 benefits were documented when debriefing was offered to women following complicated,  
257 traumatic deliveries, compared with cognitive behavioral therapy (CBT) and/or TAU.<sup>57,58</sup>

258 Debriefing offered as a later treatment for women possibly affected by CB-PTSD  
259 symptoms is associated with positive outcomes; however, evidence is derived from a single NRCT.  
260 Compared with TAU (no debriefing), a single (60-90 minutes) debriefing session delivered ~16  
261 weeks postpartum upon maternal request/referral reduced CB-PTSD symptoms and negative  
262 appraisals of childbirth, but not depression, in a sample of 80 women who met DSM Criterion A.<sup>59</sup>

263

#### 264 *Crisis Intervention*

265 Trauma-Focused (TF) crisis intervention entails providing information about the impact of  
266 stress, identifying relevant resources, and learning relaxation techniques and coping strategies in  
267 the aftermath of trauma.<sup>60</sup> A single NRCT tested TF intervention as secondary prevention for CB-  
268 PTSD; quality score was Fair (19).<sup>60</sup>

269 An early single-session TF crisis intervention performed in the neonatal intensive care unit  
270 (NICU) in women experiencing premature delivery and therefore at elevated risk for CB-PTSD  
271 showed short-term benefits.<sup>60</sup> The intervention was tested in an NRCT of 50 mothers of premature  
272 infants and was coupled with brief psychological aid and intense support during critical times. At  
273 time of hospital discharge, mothers receiving the intervention compared with TAU (can receive  
274 hospital minister counseling) had fewer overall CB-PTSD symptoms and fewer intrusion,  
275 avoidance, and hyperarousal symptoms.

276

277

278

279 *Trauma-Focused Cognitive Behavioral Therapy*

280 Trauma-Focused Cognitive Behavioral Therapy (TF-CBT) for CB-PTSD involves a  
281 manualized protocol in which cognitive distortions regarding the traumatic childbirth and related  
282 stressors are challenged to reorient adaptive thoughts and behaviors.<sup>23,42,61</sup> TF-CBT was tested in  
283 1 RCT and 1 NRCT as secondary prevention,<sup>62-64</sup> and in 2 RCTs as tertiary prevention.<sup>65,66</sup> Quality  
284 scores ranged from Fair to Good (20-27).

285 Early TF-CBT delivered during premature infant's hospitalization in women at risk for  
286 CB-PTSD shows benefits.<sup>62,63</sup> The therapy involves cognitive restructuring, muscle relaxation,  
287 construction of a narrative of the traumatic childbirth and NICU experience, psychoeducation, and  
288 infant redefinition.<sup>62,63</sup> Consecutive (6, ~50 minutes) TF-CBT one-on-one sessions delivered 1-2  
289 weeks following childbirth, vs. standard care, in an RCT of 105 women with clinically significant  
290 acute stress, yielded fewer CB-PTSD and postpartum depression (PPD) symptoms; positive  
291 treatment effects were sustained 6 months after childbirth.<sup>62,63</sup> Similarly, consecutive (6, 90  
292 minutes) TF-CBT group sessions in the NICU in 19 women (no controls) was associated with  
293 improved PPD, CB-PTSD, and anxiety symptoms, at 6 weeks and 6 months post-intervention,  
294 respectively.<sup>64</sup>

295 Findings are mixed for TF-CBT sessions focused on exposure and cognitive restructuring  
296 delivered in the months and years postpartum to affected women.<sup>65,66</sup> A series of 6-8 consecutive  
297 TF-CBT internet sessions delivered 2-4 months following medically complicated delivery was not  
298 associated with better long-term outcomes vs. TAU (conventional support) in an RCT (N = 266).<sup>65</sup>  
299 Improvement in CB-PTSD and PPD symptoms, and reported quality of life, assessed 1-year post-  
300 treatment were observed in both study conditions. In contrast, consecutive (8 weekly) sessions  
301 delivered ~2.8 years postpartum in women with provisional CB-PTSD<sup>66</sup> were associated with

302 improvement in CB-PTSD symptoms and reported quality of life compared with delayed (post 5  
303 months) treatment in an RCT of 56 women, although improvement in anxiety and PPD symptoms  
304 was observed in both treatment conditions.

305

306 *Eye Movement Desensitization and Reprocessing (EMDR)*

307 Trauma-Focused Eye Movement Desensitization and Reprocessing (TF-EMDR) for CB-  
308 PTSD involves a standardized protocol in which women are instructed to focus briefly on their  
309 traumatic memories of childbirth while receiving bilateral eye stimulation to reprocess and  
310 alleviate childbirth-related traumatic stress.<sup>44</sup> EMDR was tested in 1 RCT as secondary  
311 prevention<sup>67</sup> and 2 NRCTs as tertiary prevention.<sup>68,69</sup> Quality scores ranged from Poor to Good  
312 (13-25).

313 An early TF-EMDR intervention delivered during maternity hospitalization stay can  
314 reduce CB-PTSD symptoms in postpartum women at high risk for CB-PTSD, endorsing acute  
315 traumatic stress. A single (90-minute) session delivered within 72 hours post-delivery vs. TAU  
316 (standard psychological supportive therapy) in women with childbirth-related traumatic stress (N  
317 = 37) yielded significant reduction of CB-PTSD symptoms and subjective distress regarding recent  
318 and future deliveries, assessed 6 weeks and 3 months later.<sup>67</sup> However, no group differences were  
319 found in the prevalence of CB-PTSD diagnosis post-treatment, and improvement in mother-infant  
320 bonding and PPD symptoms was noted in both conditions. In consecutive EMDR sessions in the  
321 months and years following childbirth in affected women endorsing CB-PTSD, positive outcomes  
322 are reported;<sup>68,69</sup> it should be noted that the findings are derived from two NRCTs without control  
323 groups.

324

325 *Trauma-Focused Expressive Writing*

326 Trauma-Focused Expressive Writing (TF-EW) for CB-PTSD involves constructing a  
327 narrative about childbirth through writing with a focus on describing related thoughts and  
328 feelings.<sup>42,70</sup> This is intended to facilitate reprocessing of the birth experience and enhance  
329 meaning making.<sup>71</sup> TF-EW was tested in a total of 6 RCTs including 4 trials as secondary  
330 prevention and 2 trials as tertiary prevention. Quality scores ranged from Fair to Good (20-27).

331 TF-EW delivered in the very first days following uncomplicated pregnancies shows  
332 benefits. A single (10-15 minute) EW session about childbirth, compared with no writing,  
333 performed 48 hours postpartum in samples of 64<sup>(72)</sup> and 242<sup>(73)</sup> women, was associated with fewer  
334 hyperarousal and avoidance symptoms post-intervention. Sustained positive treatment effects (for  
335 hyperarousal) were observed at 2 months<sup>72,73</sup> and 1 year<sup>73</sup> following childbirth. Likewise, a single  
336 (~20 minute) TF-EW session about childbirth, compared with writing about daily events,  
337 performed ~96 hours post-delivery (N = 176), was associated at 3 months post-treatment with  
338 positive effects in reducing depressive and PTSD (hyperarousal and avoidance) symptoms.<sup>74</sup>  
339 Immediate treatment effects were observed for depression.

340 Consecutive TF-EW sessions can benefit postpartum women who are at risk of CB-PTSD.  
341 In a non-selective sample of 113 women, early TF-EW (2 sessions in a single day) about childbirth  
342 delivered in the first postpartum days, compared with neutral writing, produced greater reduction  
343 in CB-PTSD (avoidance and hyperarousal) symptoms, and depressive symptoms 3 months later,  
344 especially for women with relatively higher stress at baseline.<sup>75</sup> Likewise, in a high-risk sample of  
345 67 women, TF-EW (3, 15-minute sessions) in the months following prematurity, focused on the  
346 childbirth and infant's hospitalization, had positive outcomes. Compared with TAU (standard  
347 postpartum care), EW was associated with improvements in post-traumatic stress and depressive

348 symptoms, and overall mental health status, 1 month following intervention. Treatment effects (for  
349 depression) were sustained 3 months later.<sup>76</sup> Similarly, TF-EW (4, 30-minute sessions) post-  
350 discharge vs. waiting-list, in a sample of 38 postpartum women following premature delivery, was  
351 associated with improvement in post-traumatic stress 1 month post-intervention.<sup>77</sup>

352

### 353 *Psychological Counseling*

354 Psychological counseling for CB-PTSD in postpartum women usually entails semi-  
355 structured midwife-led intervention emphasizing the therapeutic relationship, acceptance of  
356 childbirth experiences, expression of emotions, social support, problem solving,<sup>39,78,79</sup> and  
357 discussion of baby care-related issues.<sup>80</sup> Psychological counseling was tested in 4 RCTs as  
358 secondary prevention, and 1 RCT as tertiary prevention. Quality scores ranged from Fair to Good  
359 (18-26).

360 One-on-one midwife-led psychological counseling in which the core intervention is  
361 conducted as a single session in the postpartum unit for women who experience traumatic  
362 childbirth shows positive effects.<sup>81,82</sup> Two studies of 90 and 103 postpartum women, respectively,  
363 who experienced birth trauma and thus met DSM Criterion A, tested a single (40-60 minutes)  
364 counseling session within 72 hours post-delivery coupled with a phone session (40-60 minutes) 4-  
365 6 weeks postpartum vs. TAU.<sup>81,82</sup> Counseling was associated with reduction in CB-PTSD and PPD  
366 symptoms,<sup>81,82</sup> less self-blame, and greater confidence about future pregnancies 3 months later,<sup>82</sup>  
367 although not reducing incidences of CB-PTSD diagnosis.<sup>82</sup>

368 A more intense early counseling therapy entailing consecutive sessions delivered in the  
369 postpartum unit and subsequently during postpartum weeks to women who experienced traumatic  
370 childbirth also showed benefits.<sup>80,83</sup> A single one-on-one (45-60 minutes) counseling session



371 delivered 24-48 hours post-delivery followed by a 45-90-minute session during postpartum care  
372 visit at 10-15 days, and a brief (15-20 minutes) counseling session via phone 4-6 weeks after  
373 delivery vs. TAU (routine post-partum care), were tested in a sample of 166 postpartum women  
374 meeting PTSD DSM Criterion A.<sup>80</sup> Counseling sessions were associated with reduced CB-PTSD  
375 and PPD symptoms, and improved maternal-infant bonding at 2 months postpartum.<sup>80</sup> Likewise,  
376 consecutive (2, 45-60 minutes) counseling sessions about the implications and consequences of an  
377 emergency Cesarean section, delivered before hospital discharge, and 2 additional sessions  
378 performed 2-3 weeks postpartum vs. TAU were tested in 99 postpartum women.<sup>83</sup> Counseling was  
379 associated with fewer CB-PTSD symptoms, less general mental distress, and more positive  
380 appraisals of recent childbirth at 1 month postpartum, with effects sustained 6 months postpartum.  
381 However, the treatment was insufficient for women with substantial post-traumatic stress reactions  
382 or general distress.<sup>83</sup>

383 In contrast, intervention of later postpartum counseling group-format intervention sessions  
384 in months following traumatic childbirth does not appear promising. Consecutive (2, 60 minutes)  
385 sessions vs. TAU in 162 women who had emergency Cesarean section did not reduce level of fear  
386 of childbirth, nor CB-PTSD or PPD symptoms, at 6 months postpartum.<sup>84</sup>

387

### 388 *Mother-Infant-Focused Interventions*

389 Mother-infant dyad interventions target the maternal-infant interaction through various modalities  
390 including skin-to-skin contact and play sessions. Improvement in the mother-infant interaction is  
391 thought to promote maternal mental health.<sup>85-87</sup> Dyad interventions were tested in 3 RCTs  
392 including 1 secondary prevention and 2 tertiary preventions.<sup>88-90</sup> Study quality scores were Good  
393 (23-26).

394 Immediate postpartum mother-infant skin-to-skin contact can have positive effects in  
395 reducing CB-PTSD symptoms following traumatic childbirth.<sup>91</sup> Skin-to-skin during the ‘magical’  
396 first postpartum hour vs. TAU (routine postpartum skin-to-skin) in 84 women meeting DSM PTSD  
397 Criterion A was associated with fewer CB-PTSD symptoms 2 weeks and 3 months post-  
398 intervention.<sup>88</sup>

399 Brief therapist-led one-on-one consecutive dyad observational and play intervention  
400 sessions following prematurity and performed at a later postpartum time point show positive  
401 outcomes in improving maternal sensitivity and post-traumatic stress symptoms. A 3-phase (33  
402 and 42 weeks post-conception, and infant age 4 months) intervention of ~5 observational and free  
403 play sessions (several hours in total) of mothers and their premature infants improved the quality  
404 of interactions in comparison with TAU (preterm without intervention) in a randomized sub-  
405 sample of 26 pairs.<sup>89</sup> The treatment was associated with increase in maternal sensitivity and infant  
406 cooperation, decrease in infant difficulty, and significant decrease in CB-PTSD symptoms from  
407 time of intervention up to 12 months postpartum.<sup>89</sup> In contrast, an earlier dyad-focused intervention  
408 initiated ~33 days postpartum and during infant NICU hospitalization stay was not associated with  
409 improved outcomes. A series of 6 sessions (5 in NICU and the last at home at 2-4 weeks post-  
410 discharge) focused on reading infants’ cues and responding was not found more helpful than TAU  
411 (standard care) in 121 women with very low birth weight infants.<sup>90</sup>

412

413

414

415

416

417 *Other Psychologically Oriented Interventions*

418 Other psychological interventions for CB-PTSD include biofeedback tested as primary  
419 prevention in an NRCT;<sup>92</sup> and a cognitive visuospatial task tested as secondary and tertiary  
420 preventions in an RCT and NRCT, respectively.<sup>93,94</sup> Study quality score ranged from Fair to Good  
421 (18-26).

422 Visual biofeedback ultrasound during the second stage of labor, involving the physician  
423 conveying a visual representation for the future mother of her pushing efforts and fetus movement  
424 in real time, shows benefits in reducing CB-PTSD risk. In an NRCT of 95 nulliparous women,<sup>92</sup>  
425 ~5 minutes of biofeedback vs. TAU (standard obstetrical coaching) increased maternal-newborn  
426 connectedness in the immediate postpartum, which in turn was associated with reduced acute stress  
427 in initial postpartum days and subsequently reduced CB-PTSD symptoms at 1 month.<sup>92</sup> There were  
428 no direct effects of the treatment on CB-PTSD symptoms.

429 A brief visuospatial cognitive task procedure performed in the immediate postpartum  
430 following emergency Cesarean delivery shows short-term positive effects.<sup>93</sup> This therapy is  
431 thought to interfere with consolidation of the traumatic visual memory, making the memory less  
432 perceptual and less intrusive.<sup>95-97</sup> A single 15-minute computer game Tetris session within 6 hours  
433 postpartum vs. TAU in a randomized sample of 56 women was found acceptable by subjects and  
434 was associated with fewer intrusive traumatic memories of childbirth 1 week post-delivery.<sup>93</sup>  
435 However, no significant treatment effects were observed for CB-PTSD, anxiety, or depression  
436 symptoms at 1 month postpartum.<sup>93</sup> Likewise, in a pilot NRCT of 18 women (without control  
437 group) with severe childbirth-related re-experiencing symptoms ~2 years postpartum,  
438 administered a single 20-minute Tetris session during childbirth recollection for the purpose of  
439 traumatic memory blockage,<sup>94</sup> the majority reported fewer intrusive memories 1-2 weeks and 5-6

440 weeks post-intervention. For subjects who met CB-PTSD diagnosis, none met diagnosis at 1 month  
441 post-intervention.

442

#### 443 *Educational Interventions*

444 Antenatal education aims to help expecting mothers via strategies for managing pregnancy,  
445 childbirth, and parenthood, and may also include postpartum interventions.<sup>98-100</sup> Education  
446 interventions are provided by midwives and nurses. This review included 1 RCT<sup>101</sup> and 1 NRCT<sup>102</sup>  
447 primary educational prevention and 1 RCT secondary educational prevention.<sup>103</sup> Study quality  
448 scores ranged from Good to Excellent (22-31).

449         Antenatal educational consecutive group sessions show benefit in non-high-risk women.<sup>102</sup>  
450 Consecutive (4, 240 minutes) sessions focused on psychological and physiological adaption vs.  
451 TAU in a non-randomized sample of 90 second- and third-trimester pregnant women were  
452 associated with less fear of childbirth in pregnancy and more expected self-efficacy, and later at  
453 6-8 weeks postpartum, with less fear of childbirth and fewer CB-PTSD symptoms.<sup>102</sup> Likewise,  
454 consecutive one-on-one sessions focused on developing a birth plan vs. TAU in a randomized  
455 sample of 106 non-high-risk third-trimester women were associated with less fear of childbirth,  
456 improved childbirth experience, and fewer CB-PTSD and PPD symptoms 4-6 weeks post-  
457 delivery.<sup>101</sup>

458         In contrast, an early postpartum educational intervention utilizing self-help materials for  
459 women who had traumatic childbirth and were at risk for CB-PTSD without professional support  
460 was insufficient to reduce CB-PTSD symptoms. In an RCT of 678 women meeting PTSD DSM-  
461 IV Criterion A, subjects receiving self-help materials on how to manage early psychological

462 responses during postpartum visit plus usual care, vs. TAU, did not show reduction in incidence  
463 of CB-PTSD diagnosis or sub-diagnosis assessed 6-12 weeks postpartum.<sup>103</sup>

464

465 **Comment**

466 *a. Principal Findings*

467 This systematic review provides insight derived from published randomized and non-  
468 randomized clinical trials of interventions tested in pregnant and postpartum women to inform  
469 evidence-based recommendations for primary and secondary prevention of CB-PTSD, and  
470 guidance for determining treatment approaches. Available studies (N=33) reviewed here range in  
471 quality between Poor and Excellent. They demonstrate that structured trauma-focused therapies  
472 and semi-structured midwife-led psychological counseling strategies are promising treatments  
473 (Figure 2). Other treatments to consider are traumatic memory blockage, mother-infant dyadic  
474 focused, and educational interventions (Figure 2). As additional RCTs are conducted, stronger  
475 evidence to support the efficacy of treatments for primary, secondary, or tertiary approaches will  
476 become available.

477

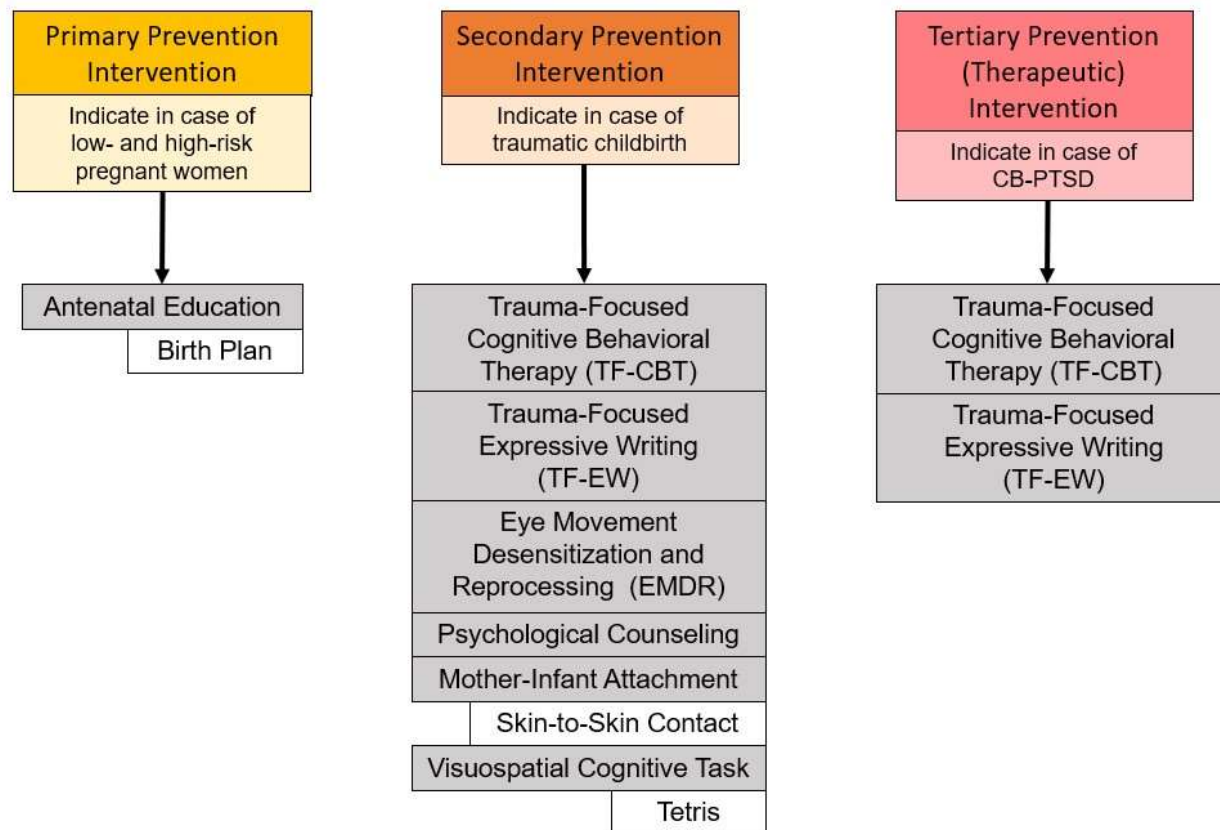

478

479

480 Figure 2. Recommended primary, secondary, and tertiary (i.e., therapeutic) interventions to  
481 mitigate or prevent the development of childbirth-related post-traumatic stress disorder (CB-  
482 PTSD). Recommendations are based on 16 studies employing randomized controlled clinical trials  
483 (RCTs) and reporting positive results. Grey boxes indicate categories of therapy strategy, and  
484 white boxes indicate specific implementations of those strategies. Trauma-Focused Expressive  
485 Writing (TF-EW) for secondary prevention was tested in universal samples.  
486

487 An array of brief postpartum psychological interventions are safe, acceptable, and feasible  
488 to implement as early treatment, often before CB-PTSD presents as a clinically diagnosable  
489 disorder, thus minimizing serious consequences. A total of 16 RCTs reveal positive outcomes  
490 (Figure 2). Among them, the secondary preventions appear promising for reducing CB-PTSD  
491 symptoms compared with usual care in women exposed to traumatic childbirth. Evidence also  
492 supports the potential positive sustained effects of brief therapies (1-4 sessions) performed within

493 48-96 hours postpartum and during maternity hospitalization stay. This “in-house” approach could  
494 greatly facilitate access to postpartum care. Although psychological debriefing following  
495 childbirth trauma may not be helpful,<sup>40,53</sup> the few available RCTs suggest the effectiveness of  
496 EMDR<sup>67</sup> and Trauma-Focused Expressive Writing (TF-EW),<sup>72-75</sup> which largely target fear  
497 extinction through reprocessing of the trauma memory; one or few sessions of psychological  
498 counseling led by a midwife near bedside;<sup>80-83</sup> and interventions focused on the mother-infant dyad  
499 (and skin-to-skin contact)<sup>88-90</sup> during the “sensitive period” following childbirth. This latter  
500 approach suggests a second therapeutic target. What remains unclear is whether useful  
501 interventions delivered in the early postpartum have efficacy as standalone treatments for women  
502 with acute clinically significant traumatic stress and whether they can reduce CB-PTSD diagnosis  
503 incidence.

504 Antepartum educational interventions delivered universally to pregnant women before  
505 childbirth may promote positive mental outcomes during pregnancy and following childbirth.<sup>101,102</sup>  
506 The limited available evidence, based on two studies, suggests that universal interventions focused  
507 on birth plan and preparation are helpful, regardless of potential for exposure to traumatic  
508 childbirth. Postpartum educational interventions targeting women experiencing traumatic  
509 childbirth do not appear sufficient for reducing CB-PTSD incidence,<sup>103</sup> underscoring the  
510 importance of the timing of educational interventions.

511 Interventions for the indication of CB-PTSD (tertiary prevention) with the goals of  
512 preventing worsening symptoms and improving functioning for women who endorse symptoms  
513 or have a diagnosis may have substantial benefits for the developing child. This review identified  
514 5 RCT-tested interventions supporting the potential benefits of trauma-focused therapies  
515 (expressive writing and TF-CBT).

516 *b. Comparison with Existing Literature*

517 A large body of literature addresses treatment approaches for PTSD in non-postpartum  
518 individuals.<sup>104-106</sup> Although trauma-focused interventions are the gold standard, they suffer from  
519 high dropout rate,<sup>107-109</sup> and some individuals with PTSD will remain treatment resistant.<sup>110-112</sup>  
520 This underscores the importance of intervening effectively in the aftermath of trauma to buffer the  
521 development of persistent symptoms.

522 Currently, limited data are available on effective interventions to prevent PTSD.<sup>45-47</sup>  
523 Childbirth, however, provides a unique opportunity to test early post-birth therapies for PTSD  
524 stemming from traumatic childbirth, facilitated by immediate access to postpartum patients. This  
525 review provides new insight on promising secondary preventive approaches for CB-PTSD,  
526 including the benefits of intervening in the very first post-trauma exposure days, which, with more  
527 replicated and high-quality studies, could inform clinical recommendations. This review expands  
528 the emerging literature on CB-PTSD therapies by covering trials published through December  
529 2022. The available data favor targeted rather than universal approaches to treat postpartum  
530 women.

531 *c. Strengths and Limitations*

532 This review adopts a comprehensive approach to evaluate available data on preventive  
533 interventions and treatments for CB-PTSD via quality assessment of all clinical trials published to  
534 date, not limited to a specific treatment modality, treatment time period, or maternal population.  
535 Hence, we provide insight into all three types of potential interventions, what the optimal timing  
536 for intervention may be, and which populations will benefit most. We use a well-validated  
537 standardized quantitative approach based on the PRISMA guidelines<sup>49</sup> for study selection and data  
538 extraction, and assess external validity, internal validity, and power, to evaluate the published



539 trials' quality. While the primary outcome is CB-PTSD, we also consider co-morbid conditions,  
540 such as postpartum depression. Nevertheless, several limitations are worth noting. This review's  
541 quality assessment was performed for each treatment modality separately, and grouping RCTs and  
542 non-RCTs studies into the relevant category. The main limitation in this approach is the small  
543 number of trials in some categories, which may limit the interpretation of the quality score range.  
544 Some studies lacked information about sample characteristics, degree of pre-treatment CB-PTSD  
545 severity, and clear time point of treatment outcome assessment, and these characteristics are only  
546 partly reflected in the assessment scale. Likewise, the definition of high-risk women exposed to  
547 childbirth trauma varied among studies and may have affected the ability to detect treatment  
548 effects. We did not intend to perform meta-analyses, which may have provided additional  
549 information. Finally, the number of published trials per prevention type is limited, which may  
550 prevent drawing strong conclusions.

551

#### 552 *d. Conclusions and Implications*

553 Maternal psychiatric morbidities are a leading complication of childbirth<sup>113-115</sup> and involve  
554 heavy public health costs.<sup>116-118</sup> Substantial evidence shows that a significant portion of women  
555 experiencing traumatic childbirth develop persistent symptoms of childbirth-related PTSD (CB-  
556 PTSD),<sup>3,12,13,119</sup> which cause functional impairment.<sup>24</sup> Standards are lacking regarding what type  
557 of psychological therapy should be routinely delivered in postpartum care for the prevention or  
558 indication of this disorder, and this can have adverse consequences far beyond the directly affected  
559 postpartum woman. The available studies covered in this review suggest that intervening early in  
560 the postpartum period, and as soon as feasible, may reduce trauma reactions and in turn prevent  
561 CB-PTSD diagnosis. As a first step, this would require accurate identification of high-risk women

562 who have experienced complicated, traumatic childbirth and may also show clinically significant  
563 acute stress.<sup>120</sup> Early therapy delivered to high-risk women, rather than universally in the maternal  
564 population, would allocate available resources to those most in need and lower medical costs. A  
565 second critical step is ensuring treatment uptake during postpartum care. As presented in this  
566 review, manualized brief therapies delivered during maternity hospitalization stay offer a  
567 promising time window for effective therapy that also has the advantage of improving equity in  
568 care. A primary preventive approach in high-risk women may involve interventions focused on  
569 preparation for forthcoming childbirth delivered to pregnant women when they are already in  
570 frequent contact with health providers and during a time of motivation for self-care.

571         Important areas for future research include replicating the reported studies using adequate  
572 sample sizes, assessing long-term outcomes in RCT designs, shifting from exclusive patient self-  
573 report to also including mechanistic biomarkers, and identifying the golden hours following  
574 childbirth to maximize treatment response and uptake. Additionally, testing adjunctive or  
575 alternative non-trauma-focused intervention approaches that appear promising in individuals with  
576 general PTSD (e.g., mindfulness,<sup>121</sup> yoga,<sup>122</sup> metacognitive therapy (MCT)),<sup>123</sup> and regarding  
577 resilience and psychological growth,<sup>124</sup> therapies to enhance those traits, as well as the use of safe  
578 drug therapies (e.g., intra-nasal oxytocin),<sup>125</sup> will expand available treatment options.

579         Ultimately, a personalized treatment approach incorporating therapeutic acceptability to  
580 the pregnant or postpartum woman and considering degree of symptom severity rather than a “one  
581 size fits all” strategy is likely to maximize treatment effectiveness. Based on the current state of  
582 knowledge, perinatal and mental health providers are strongly encouraged to consider on a case-  
583 by-case basis promising treatment options to prevent post-traumatic stress in the wake of childbirth  
584 trauma.

585 **Appendix A:** Modified Downs and Black Checklist used in this systematic review.

586

587 **REFERENCES**

588 1. Sommerlad S, Schermelleh-Engel K, La Rosa VL, Louwen F, Oddo-Sommerfeld S. Trait  
589 anxiety and unplanned delivery mode enhance the risk for childbirth-related post-traumatic stress  
590 disorder symptoms in women with and without risk of preterm birth: a multi sample path  
591 analysis. *PLoS One* 2021;16:e0256681.

592  
593 2. Turkmen H, Yalniz Dilcen H, Akin B. The effect of labor comfort on traumatic childbirth  
594 perception, post-traumatic stress disorder, and breastfeeding. *Breastfeed Med* 2020;15:779–88.

595  
596 3. Dekel S, Stuebe C, Dishy G. Childbirth induced posttraumatic stress syndrome: a systematic  
597 review of prevalence and risk factors. *Front Psychol* 2017;8:560.  
598 <https://doi.org/10.3389/fpsyg.2017.00560>

599  
600 4. Centers for Disease Control (2023) Reproductive Health: Severe Maternal Morbidity.  
601 [https://www.cdc.gov/reproductivehealth/maternalinfanthealth/smm/rates-severe-morbidity-](https://www.cdc.gov/reproductivehealth/maternalinfanthealth/smm/rates-severe-morbidity-indicator.htm)  
602 [indicator.htm](https://www.cdc.gov/reproductivehealth/maternalinfanthealth/smm/rates-severe-morbidity-indicator.htm)  
603 Accessed 14 August 2023.

604  
605 5. Snowden JM, Lyndon A, Kan P, El Ayadi A, Main E, Carmichael SL. Severe maternal  
606 morbidity: a comparison of definitions and data sources. *Am J Epidemiol* 2021;190(9):1890-  
607 1897. doi:10.1093/aje/kwab077

608  
609 6. Rossen LM, Womack LS, Hoyert DL, Anderson RN, Uddin SFG. The impact of the  
610 pregnancy checkbox and misclassification on maternal mortality trends in the United States,  
611 1999–2017. *National Center for Health Statistics. Vital Health Stat* 2020;3(44):1-61.

612  
613 7. MacDorman MF, Declercq E, Cabral H, Morton C. Is the United States maternal mortality rate  
614 increasing? Disentangling trends from measurement issues. *Obstetrics and Gynecology*  
615 2016;128(3):447.

616  
617 8. Berger BO, Jeffers NK, Wolfson C, Gemmill A. Role of maternal age in increasing severe  
618 maternal morbidity rates in the United States. *Obstetrics & Gynecology* 2023;142(2):371-380.

619  
620 9. Declercq ER, Cabral HJ, Cui X, Liu CL, Amutah-Onukagha N, Larson E, Meadows A, Diop  
621 H. Using longitudinally linked data to measure severe maternal morbidity. *Obstetrics &*  
622 *Gynecology* 2022;139(2):165-171.

623  
624 10. Hirai AH, Owens PL, Reid LD, Vladutiu CJ, Main EK. Trends in severe maternal morbidity  
625 in the US across the transition to ICD-10-CM/PCS from 2012-2019. *JAMA Network Open*  
626 2022;5(7):e2222966-e2222966.

627

- 628 11. American Psychiatric Association. Diagnostic and Statistical Manual of Mental Disorders.  
629 Fifth Edition. American Psychiatric Association; 2013. doi:10.1176/appi.books.9780890425596  
630
- 631 12. Chan SJ, Thiel F, Kaimal AJ, Pitman RK, Orr SP, Dekel S. Validation of childbirth-related  
632 posttraumatic stress disorder using psychophysiological assessment. *Am J Obstet Gynecol*  
633 2022;227(4):656-659. doi:10.1016/j.ajog.2022.05.051  
634
- 635 13. Heyne CS, Kazmierczak M, Souday R, et al. Prevalence and risk factors of birth-related  
636 posttraumatic stress among parents: a comparative systematic review and meta-analysis. *Clin*  
637 *Psychol Rev* 2022;94:102157. doi:10.1016/j.cpr.2022.102157  
638
- 639 14. Yildiz PD, Ayers S, Phillips L. The prevalence of posttraumatic stress disorder in pregnancy  
640 and after birth: a systematic review and meta-analysis. *J Affect Disord* 2017;208:634-645.  
641
- 642 15. Thiel F, Dekel S. Peritraumatic dissociation in childbirth-evoked posttraumatic stress and  
643 postpartum mental health. *Arch Women's Ment Health* 2020;23:189-197.  
644
- 645 16. Dekel S, Ein-Dor T, Berman Z, Barsoumian IS, Agarwal S, Pitman RK. Delivery mode is  
646 associated with maternal mental health following childbirth. *Arch Women's Mentl Health* 2019;  
647 22:817-824.  
648
- 649 17. Iyengar AS, Ein-Dor T, Zhang EX, Chan SJ, Kaimal AJ, Dekel S. Increased traumatic  
650 childbirth and postpartum depression and lack of exclusive breastfeeding in Black and Latinx  
651 individuals. *Int J Gynecol Obstet* 2022;158(3):759-761. doi:10.1002/ijgo.14280  
652
- 653 18. Ertan D, Hingray C, Burlacu E, Sterlé A, El-Hage W. Post-traumatic stress disorder  
654 following childbirth. *BMC psychiatry* 2021;21(155):1-9. [https://doi.org/10.1186/s12888-021-](https://doi.org/10.1186/s12888-021-03158-6)  
655 03158-6  
656
- 657 19. Dekel S, Ein-Dor T, Dishy GA, Mayopoulos PA. Beyond postpartum depression:  
658 posttraumatic stress-depressive response following childbirth. *Arch Women's Ment Health*  
659 2020;23(4):557-564. doi:10.1007/s00737-019-01006-x  
660
- 661 20. Ayers S, Bond R, Bertullies S, Wijma K. The aetiology of post-traumatic stress following  
662 childbirth: a meta-analysis and theoretical framework. *Psychol Med* 2016;46(6):1121-34.  
663
- 664 21. Thiel F, Ein-Dor T, Dishy G, King A, Dekel S. Examining symptom clusters of childbirth-  
665 related posttraumatic stress disorder. *Prim Care Companion CNS Disord* 2018;20(5):26912.  
666 doi:10.4088/PCC.18m02322  
667
- 668 22. Cirino NH, Knapp JM. Perinatal posttraumatic stress disorder: a review of risk factors,  
669 diagnosis, and treatment. *Obstetrical & Gynecological Survey* 2019;74(6):369-376.  
670
- 671 23. James S. Women's experiences of symptoms of posttraumatic stress disorder (PTSD) after  
672 traumatic childbirth: a review and critical appraisal. *Arch Women's Ment Health*  
673 2015;18(6):761-771. doi:10.1007/s00737-015-0560-x

- 674  
675 24. Ayers S, Harris R, Sawyer A, Parfitt Y, Ford E. Posttraumatic stress disorder after childbirth:  
676 analysis of symptom presentation and sampling. *J Affective Disor* 2009;119(1-3):200-204.  
677
- 678 25. Berman Z, Kaim A, Reed T, Felicione J, Hinojosa C, Oliver K, Rutherford H, Mayes L, Shin  
679 L, Dekel S. Amygdala response to traumatic childbirth recall is associated with impaired  
680 bonding behaviors in mothers with childbirth-related PTSD symptoms: preliminary findings.  
681 *Biolog Psychiat* 2020;87(9):S142.  
682
- 683 26. Stuifzand S, Garthus-Niegel S, Horsch A. Parental birth-related PTSD symptoms and  
684 bonding in the early postpartum period: a prospective population-based cohort study. *Front*  
685 *Psychiatry* 2020;11:570727.  
686
- 687 27. Dekel S, Thiel F, Dishy G, Ashenfarb AL. Is childbirth-induced PTSD associated with low  
688 maternal attachment? *Arch Women's Ment Health* 2019;22(1):119-122. doi:10.1007/s00737-  
689 018-0853-y  
690
- 691 28. Mayopoulos GA, Ein-Dor T, Dishy GA, Nandru R, Chan SJ, Hanley LE, Kaimal AJ, Dekel  
692 S. COVID-19 is associated with traumatic childbirth and subsequent mother-infant bonding  
693 problems. *J Affect Disord* 2021;282:122-125.  
694
- 695 29. Van Sielegem S, Danckaerts M, Rieken R, Okkerse JM, de Jonge E, Bramer WM,  
696 Lambregtse-van den Berg MP. Childbirth related PTSD and its association with infant outcome:  
697 A systematic review. *Early Human Devel* 2022;174:105667.  
698 <https://doi.org/10.1016/j.earlhumdev.2022.105667>  
699
- 700 30. Stramrood C, Slade P. 2017. A woman afraid of becoming pregnant again: posttraumatic  
701 stress disorder following childbirth. In: Paarlberg, K., van de Wiel, H. (eds) *Bio-Psycho-Social*  
702 *Obstetrics and Gynecology*. Springer, Cham. [https://doi.org/10.1007/978-3-319-40404-2\\_2](https://doi.org/10.1007/978-3-319-40404-2_2)  
703
- 704 31. McKenzie-McHarg K, Ayers S, Ford E, Horsch A, Jomeen J, Sawyer A, Stramrood C,  
705 Thomson G, Slade P. Post-traumatic stress disorder following childbirth: an update of current  
706 issues and recommendations for future research. *J Reproductive Infant Psychol* 2015;33(3):219-  
707 237. <https://doi.org/10.1080/02646838.2015.1031646>  
708
- 709 32. Garthus-Niegel S, Horsch A, Handtke E. et al. The impact of postpartum posttraumatic stress  
710 and depression symptoms on couples' relationship satisfaction: a population-based prospective  
711 study. *Front Psychol* 2018;9:1728. doi:10.3389/fpsyg.2018.01728  
712
- 713 33. Kranenburg L, Lambregtse-van den Berg M, and Stramrood C. Traumatic childbirth  
714 experience and childbirth-related post-traumatic stress disorder (PTSD): a contemporary  
715 overview. *Int J Environment Res and Public Health* 2023;20(4):2775.  
716
- 717 34. Söderquist J, Wijma B, Wijma K. The longitudinal course of post-traumatic stress after  
718 childbirth. *J Psychosomatic Obstetrics & Gynecology* 2006;27(2):113-119.  
719

- 720 35. Vermetten E, Zhohar J, Krugers HJ. Pharmacotherapy in the aftermath of trauma;  
721 opportunities in the ‘golden hours.’ *Curr Psychiatry Rep* 2014;16(7):455. doi:10.1007/s11920-  
722 014-0455-y  
723
- 724 36. van Marle H. PTSD as a memory disorder. *Eur J Psychotraumatology* 2015;6(1):27633.  
725
- 726 37. Qi W, Gevonden M, Shalev A. Prevention of post-traumatic stress disorder after trauma:  
727 current evidence and future directions. *Curr Psychiatry Rep* 2016;18(2):20. doi:10.1007/s11920-  
728 015-0655-0  
729
- 730 38. Carmi L, Fostick L, Burshtein S, Cwikel-Hamzany S, Zohar J. PTSD treatment in light of  
731 DSM-5 and the “golden hours” concept. *CNS Spectr*. 2016;21(4):279-282.  
732 doi:10.1017/S109285291600016X  
733
- 734 39. Gamble J, Creedy D. Content and processes of postpartum counseling after a distressing birth  
735 experience: a review. *Birth*. 2004;31(3):213-218. doi:10.1111/j.0730-7659.2004.00307.x  
736
- 737 40. Lapp LK, Agbokou C, Peretti CS, Ferreri F. Management of post traumatic stress disorder  
738 after childbirth: a review. *J Psychosom Obstet Gynecol* 2010;31(3):113-122.  
739 doi:10.3109/0167482X.2010.503330  
740
- 741 41. Peeler S, Chung MC, Stedmon J, Skirton H. A review assessing the current treatment  
742 strategies for postnatal psychological morbidity with a focus on post-traumatic stress disorder.  
743 *Midwifery* 2013;29(4):377-388. doi:10.1016/j.midw.2012.03.004  
744
- 745 42. Furuta M, Horsch A, Ng ESW, Bick D, Spain D, Sin J. Effectiveness of trauma-focused  
746 psychological therapies for treating post-traumatic stress disorder symptoms in women following  
747 childbirth: a systematic review and meta-analysis. *Front Psychiatry* 2018;9:591.  
748 doi:10.3389/fpsy.2018.00591  
749
- 750 43. De Graaff LF, Honig A, Van Pampus MG, Stramrood CAI. Preventing post-traumatic stress  
751 disorder following childbirth and traumatic birth experiences: a systematic review. *Acta Obstet*  
752 *Gynecol Scand* 2018;97(6):648-656. doi:10.1111/aogs.13291  
753
- 754 44. De Bruijn L, Stramrood CA, Lambregtse-van Den Berg MP, Rius Ottenheim N. Treatment of  
755 posttraumatic stress disorder following childbirth. *J Psychosom Obstet Gynecol* 2020;41(1):5-14.  
756 doi:10.1080/0167482X.2019.1593961  
757
- 758 45. Shorey S, Downe S, Chua JYX, Byrne SO, Fobelets M, Lalor JG. Effectiveness of  
759 psychological interventions to improve the mental well-being of parents who have experienced  
760 traumatic childbirth: a systematic review and meta-analysis. *Trauma Violence Abuse*  
761 2023;24(3):1238-1253. doi:10.1177/15248380211060808  
762  
763  
764  
765

- 766 46. Taylor Miller PG, Sinclair M, Gillen P, et al. Early psychological interventions for  
767 prevention and treatment of post-traumatic stress disorder (PTSD) and post-traumatic stress  
768 symptoms in post-partum women: a systematic review and meta-analysis. Sar V, ed. PLOS ONE  
769 2021;16(11):e0258170. doi:10.1371/journal.pone.0258170  
770
- 771 47. Slade PP, Molyneux DR, Watt DA. A systematic review of clinical effectiveness of  
772 psychological interventions to reduce post traumatic stress symptoms following childbirth and a  
773 meta-synthesis of facilitators and barriers to uptake of psychological care. *J Affect Disord*  
774 2021;281:678-694. doi:10.1016/j.jad.2020.11.092  
775
- 776 48. Downs SH, Black N. The feasibility of creating a checklist for the assessment of the  
777 methodological quality both of randomised and non-randomised studies of health care  
778 interventions. *J Epidemiol Community Health* 1998;52(6):377-384. doi:10.1136/jech.52.6.377  
779
- 780 49. Moher D, Liberati A, Tetzlaff J, Altman DG, for the PRISMA Group. Preferred reporting  
781 items for systematic reviews and meta-analyses: the PRISMA statement. *BMJ* 2009;339(Jul21  
782 1):b2535-b2535. doi:10.1136/bmj.b2535  
783
- 784 50. Xie T, Brouwer RW, van den Akker-Scheek I, van der Veen HC. Clinical relevance of joint  
785 line obliquity after high tibial osteotomy for medial knee osteoarthritis remains controversial: a  
786 systematic review. *Knee Surg Sports Traumatol Arthrosc* 2023 Jun 20. doi: 10.1007/s00167-023-  
787 07486-w. PMID: 37340220.  
788
- 789 51. Trac MH, McArthur E, Jandoc R, et al. Macrolide antibiotics and the risk of ventricular  
790 arrhythmia in older adults. *Can Med Assoc J* 2016;188(7):E120-E129. doi:10.1503/cmaj.150901  
791
- 792 52. Corso LML, Macdonald HV, Johnson BT, et al. Is concurrent training efficacious  
793 antihypertensive therapy? A meta-analysis. *Med Sci Sports Exerc* 2016;48(12):2398-2406.  
794 doi:10.1249/MSS.0000000000001056  
795
- 796 53. Bastos MH, Furuta M, Small R, McKenzie-McHarg K, Bick D. Debriefing interventions for  
797 the prevention of psychological trauma in women following childbirth. Cochrane Common  
798 Mental Disorders Group, ed. *Cochrane Database Syst Rev* 2015.  
799 doi:10.1002/14651858.CD007194.pub2; PMID: 25858181.  
800
- 801 54. Phillips S. Debriefing following traumatic childbirth. *Br J Midwifery* 2003;11:725-730.  
802 10.12968/bjom.2003.11.12.11866.  
803
- 804 55. Selkirk R, McLaren S, Ollerenshaw A, McLachlan AJ, Moten J. The longitudinal effects of  
805 midwife-led postnatal debriefing on the psychological health of mothers. *J Reprod Infant*  
806 *Psychol* 2006;24(2):133-147. doi:10.1080/02646830600643916  
807
- 808 56. Priest SR, Henderson J, Evans SF, Hagan R. Stress debriefing after childbirth: a randomised  
809 controlled trial. *Med J Aust* 2003;178(11):542-545. doi:10.5694/j.1326-5377.2003.tb05355.x  
810

- 811 57. Abdollahpour S, Khosravi A, Motaghi Z, Keramat A, Mousavi SA. Effect of brief cognitive  
812 behavioral counseling and debriefing on the prevention of post-traumatic stress disorder in  
813 traumatic birth: a randomized clinical trial. *Community Ment Health J* 2019;55(7):1173-1178.  
814 doi:10.1007/s10597-019-00424-6  
815
- 816 58. Kershaw K, Jolly J, Bhabra K, Ford J. Randomised controlled trial of community debriefing  
817 following operative delivery. *BJOG Int J Obstet Gynaecol* 2005;112(11):1504-1509.  
818 doi:10.1111/j.1471-0528.2005.00723.x  
819
- 820 59. Meades R, Pond C, Ayers S, Warren F. Postnatal debriefing: have we thrown the baby out  
821 with the bath water? *Behav Res Ther* 2011;49(5):367-372. doi:10.1016/j.brat.2011.03.002  
822
- 823 60. Jotzo M, Poets CF. Helping parents cope with the trauma of premature birth: an evaluation of  
824 a trauma-preventive psychological intervention. *Pediatrics* 2005;115(4):915-919.  
825 doi:10.1542/peds.2004-0370  
826
- 827 61. Ayers S, McKenzie-McHarg K, Eagle A. Cognitive behaviour therapy for postnatal post-  
828 traumatic stress disorder: case studies. *J Psychosom Obstet Gynecol* 2007;28(3):177-184.  
829 doi:10.1080/01674820601142957  
830
- 831 62. Shaw RJ, St John N, Lilo EA, et al. Prevention of traumatic stress in mothers with preterm  
832 infants: a randomized controlled trial. *Pediatrics* 2013;132(4):e886-e894. doi:10.1542/peds.2013-  
833 1331  
834
- 835 63. Shaw RJ, St John N, Lilo E, et al. Prevention of traumatic stress in mothers of preterms: 6-  
836 month outcomes. *Pediatrics* 2014;134(2):e481-e488. doi:10.1542/peds.2014-0529  
837
- 838 64. Simon S, Moreyra A, Wharton E, et al. Prevention of posttraumatic stress disorder in mothers  
839 of preterm infants using trauma-focused group therapy: Manual development and evaluation.  
840 *Early Hum Dev* 2021;154:105282. doi:10.1016/j.earlhumdev.2020.105282  
841
- 842 65. Sjömark J, Svanberg AS, Larsson M, et al. Effect of internet-based cognitive behaviour  
843 therapy among women with negative birth experiences on mental health and quality of life - a  
844 randomized controlled trial. *BMC Pregnancy Childbirth* 2022;22(1):835. doi:10.1186/s12884-  
845 022-05168-y  
846
- 847 66. Nieminen K, Berg I, Frankenstein K, et al. Internet-provided cognitive behaviour therapy of  
848 posttraumatic stress symptoms following childbirth—a randomized controlled trial. *Cognitive*  
849 *Behav Therapy* 2016;45(4):287-306.  
850
- 851 67. Chiorino V, Cattaneo MC, Macchi EA, et al. The EMDR Recent Birth Trauma Protocol: a  
852 pilot randomised clinical trial after traumatic childbirth. *Psychol Health* 2020;35(7):795-810.  
853 doi:10.1080/08870446.2019.1699088  
854



- 855 68. Sandström M, Wiberg B, Wikman M, Willman AK, Högberg U. A pilot study of eye  
856 movement desensitisation and reprocessing treatment (EMDR) for post-traumatic stress after  
857 childbirth. *Midwifery* 2008;24(1):62-73. doi:10.1016/j.midw.2006.07.008  
858
- 859 69. Kranenburg LW, Bijma HH, Eggink AJ, Knijff EM, Lambregtse-van Den Berg MP.  
860 Implementing an Eye Movement and Desensitization Reprocessing treatment-program for  
861 women with posttraumatic stress disorder after childbirth. *Front Psychol* 2022;12:797901.  
862 doi:10.3389/fpsyg.2021.797901  
863
- 864 70. Qian J, Zhou X, Sun X, Wu M, Sun S, Yu X. Effects of expressive writing intervention for  
865 women's PTSD, depression, anxiety and stress related to pregnancy: A meta-analysis of  
866 randomized controlled trials. *Psychiatry Res* 2020 Jun;288:112933. doi:  
867 10.1016/j.psychres.2020.112933. PMID: 32315889.  
868
- 869 71. Thompson-Hollands J, Marx BP, Sloan DM. Brief novel therapies for PTSD: written  
870 exposure therapy. *Curr Treat Options Psychiatry* 2019;6(2):99-106. doi:10.1007/s40501-019-  
871 00168-w  
872
- 873 72. Di Blasio P, Ionio C. Childbirth and narratives: how do mothers deal with their child's birth?  
874 *J Prenat Perinat Psychol Heal* 2002;17(2):143-151.  
875
- 876 73. Di Blasio P, Ionio C, Confalonieri E. Symptoms of postpartum PTSD and expressive writing:  
877 a prospective study. *J Prenat Perinat Psychol Heal* 2009;24:49-66.  
878
- 879 74. Di Blasio P, Miragoli S, Camisasca E, Di Vita AM, Pizzo R, Pipitone L. Emotional distress  
880 following childbirth: an intervention to buffer depressive and PTSD symptoms. *Eur J Psychol*  
881 2015;11(2):214-232. doi:10.5964/ejop.v11i2.779  
882
- 883 75. Di Blasio P, Camisasca E, Caravita SCS, Ionio C, Milani L, Valtolina GG. The effects of  
884 expressive writing on postpartum depression and posttraumatic stress symptoms. *Psychol Rep*  
885 2015;117(3):856-882. doi:10.2466/02.13.PR0.117c29z3  
886
- 887 76. Horsch A, Tolsa JF, Gilbert L, Du Chêne LJ, Müller-Nix C, Graz MB. Improving maternal  
888 mental health following preterm birth using an expressive writing intervention: a randomized  
889 controlled trial. *Child Psychiatry Hum Dev* 2016;47(5):780-791. doi:10.1007/s10578-015-0611-  
890 6  
891
- 892 77. Barry LM, Singer GHS. Reducing maternal psychological distress after the NICU experience  
893 through journal writing. *J Early Interv.* 2001;24(4):287-297. doi:10.1177/105381510102400404  
894
- 895 78. Navidian A, Saravani Z, Shakiba M. Impact of psychological grief counseling on the severity  
896 of post-traumatic stress symptoms in mothers after stillbirths. *Issues Ment Health Nurs* 2017  
897 Aug;38(8):650-654. doi: 10.1080/01612840.2017.1315623. PMID: 28745912.  
898

- 899 79. Alder J, Stadlmayr W, Tschudin S, Bitzer J. Posttraumatic symptoms after childbirth: what  
900 should we offer? *J Psychosom Obstet Gynaecol*. 2006 Jun;27(2):107-12. doi:  
901 10.1080/01674820600714632. PMID: 16808085.  
902
- 903 80. Bahari S, Nourizadeh R, Esmailpour K, Hakimi S. The effect of supportive counseling on  
904 mother psychological reactions and mother–infant bonding following traumatic childbirth. *Issues*  
905 *Ment Health Nurs*. 2022;43(5):447-454. doi:10.1080/01612840.2021.1993388  
906
- 907 81. Asadzadeh L, Jafari E, Kharaghani R, Taremian F. Effectiveness of midwife-led brief  
908 counseling intervention on post-traumatic stress disorder, depression, and anxiety symptoms of  
909 women experiencing a traumatic childbirth: a randomized controlled trial. *BMC Pregnancy*  
910 *Childbirth*. 2020;20(1):142. doi:10.1186/s12884-020-2826-1  
911
- 912 82. Gamble J, Creedy D, Moyle W, Webster J, McAllister M, Dickson P. Effectiveness of a  
913 counseling intervention after a traumatic childbirth: a randomized controlled trial. *Birth*  
914 2005;32(1):11-19. doi:10.1111/j.0730-7659.2005.00340.x  
915
- 916 83. Ryding EL, Wijma K, Wijma B. Postpartum counselling after an emergency cesarean. *Clin*  
917 *Psychol Psychother* 1998;5(4):231-237. doi:10.1002/(SICI)1099-0879(199812)5:4<231::AID-  
918 CPP172>3.0.CO;2-9  
919
- 920 84. Ryding EL, Wiren E, Johansson G, Ceder B, Dahlstrom AM. Group counseling for mothers  
921 after emergency Cesarean section: a randomized controlled trial of intervention. *Birth*  
922 2004;31(4):247-253. doi:10.1111/j.0730-7659.2004.00316.x  
923
- 924 85. Loh AHY, Ong LL, Yong FSH, Chen HY. Improving mother-infant bonding in postnatal  
925 depression - the SURE MUMS study. *Asian J Psychiatr* 2023 Mar;81:103457. doi:  
926 10.1016/j.ajp.2023.103457. PMID: 36638754.  
927
- 928 86. Bieleninik Ł, Lutkiewicz K, Cieślak M, Preis-Orlikowska J, Bidzan M. Associations of  
929 maternal-infant bonding with maternal mental health, infant's characteristics and socio-  
930 demographical variables in the early postpartum period: a cross-sectional study. *Int J Environ*  
931 *Res Public Health* 2021;18(16):8517. doi: 10.3390/ijerph18168517. PMID: 34444265; PMCID:  
932 PMC8392040.  
933
- 934 87. Phillips R. The sacred hour: uninterrupted skin-to-skin contact immediately after birth.  
935 *Newborn Infant Nurs Rev* 2013;13(2):67-72. doi:10.1053/j.nainr.2013.04.001  
936
- 937 88. Abdollahpour S, Khosravi A, Bolbolhaghghi N. The effect of the magical hour on post-  
938 traumatic stress disorder (PTSD) in traumatic childbirth: a clinical trial. *J Reprod Infant Psychol*  
939 2016;34(4):403-412. doi:10.1080/02646838.2016.1185773  
940
- 941 89. Borghini A, Habersaat S, Forcada-Guex M, et al. Effects of an early intervention on maternal  
942 post-traumatic stress symptoms and the quality of mother–infant interaction: The case of preterm  
943 birth. *Infant Behav Dev* 2014;37(4):624-631. doi:10.1016/j.infbeh.2014.08.003  
944

- 945 90. Zelkowitz P, Feeley N, Shrier I, et al. The Cues and Care randomized controlled trial of a  
946 neonatal intensive care unit intervention: effects on maternal psychological distress and mother-  
947 infant interaction. *J Dev Behav Pediatr* 2011;32(8):591-599.  
948 doi:10.1097/DBP.0b013e318227b3dc  
949
- 950 91. Kahalon R, Preis H, Benyamini Y. Mother-infant contact after birth can reduce postpartum  
951 post-traumatic stress symptoms through a reduction in birth-related fear and guilt. *J Psychosom*  
952 *Res* 2022;154:110716. doi:10.1016/j.jpsychores.2022.110716  
953
- 954 92. Schlesinger Y, Hamiel D, Rousseau S, et al. Preventing risk for posttraumatic stress  
955 following childbirth: Visual biofeedback during childbirth increases maternal connectedness to  
956 her newborn thereby preventing risk for posttraumatic stress following childbirth. *Psychol*  
957 *Trauma Theory Res Pract Policy* 2022;14(6):1057-1065. doi:10.1037/tra0000558  
958
- 959 93. Horsch A, Vial Y, Favrod C, et al. Reducing intrusive traumatic memories after emergency  
960 caesarean section: a proof-of-principle randomized controlled study. *Behav Res Ther*  
961 2017;94:36-47. doi:10.1016/j.brat.2017.03.018  
962
- 963 94. Deforges C, Fort D, Stuijzand S, Holmes EA, Horsch A. Reducing childbirth-related  
964 intrusive memories and PTSD symptoms via a single-session behavioural intervention including  
965 a visuospatial task: a proof-of-principle study. *J Affect Disord* 2022;303:64-73.  
966 doi:10.1016/j.jad.2022.01.108  
967
- 968 95. Iyadurai L, Blackwell S, Meiser-Stedman R. et al. Preventing intrusive memories after  
969 trauma via a brief intervention involving Tetris computer game play in the emergency  
970 department: a proof-of-concept randomized controlled trial. *Mol Psychiatry* 2018;23:674-682.  
971 <https://doi.org/10.1038/mp.2017.23>  
972
- 973 96. Kavanagh DJ, Freese S, Andrade J, May J. Effects of visuospatial tasks on desensitization to  
974 emotive  
975 memories. *Br J Clin Psychol* 2001;40(3):267-280. PubMed: 11593955  
976
- 977 97. Andrade J, Kavanagh D, Baddeley A. Eye-movements and visual imagery: A working  
978 memory approach  
979 to the treatment of post-traumatic stress disorder. *Br J Clinical Psychol.* 1997;36(Pt 2):209-223.  
980 PMID: 9167862.  
981
- 982 98. World Health Organization. Geneva: World Health Organization; 2016. WHO  
983 Recommendations on Antenatal Care for a Positive Pregnancy Experience. ISBN:  
984 9789241549912. WHO Reference Number: WHO/RHR/16.12 (Executive summary) Accessible  
985 at: <https://www.who.int/publications/i/item/9789241549912>  
986
- 987 99. Gagnon AJ, Sandall J. Individual or group antenatal education for childbirth or parenthood,  
988 or both. *Cochrane Database of Systematic Reviews* 2007; 3.  
989

- 990 100. Spinelli A, Baglio G, Donati S, Grandolfo ME, Osborn J. Do antenatal classes benefit the  
991 mother and her baby? *J Matern Fetal Neonatal Med* 2003;13(2):94-101.  
992 doi:10.1080/jmf.13.2.94.101  
993
- 994 101. Ahmadpour P, Moosavi S, Mohammad-Alizadeh-Charandabi S, Jahanfar S,  
995 Mirghafourvand M. Effect of implementing a birth plan on maternal and neonatal outcomes: a  
996 randomized controlled trial. *BMC Pregnancy Childbirth*. 2022;22(1):862. doi:10.1186/s12884-  
997 022-05199-5  
998
- 999 102. Gökçe İsbir G, İnci F, Önal H, Yıldız PD. The effects of antenatal education on fear of  
1000 childbirth, maternal self-efficacy and post-traumatic stress disorder (PTSD) symptoms following  
1001 childbirth: an experimental study. *Appl Nurs Res* 2016;32:227-232.  
1002 doi:10.1016/j.apnr.2016.07.013  
1003
- 1004 103. Slade P, West H, Thomson G, et al. STRAWB2 (Stress and Wellbeing After Childbirth): a  
1005 randomised controlled trial of targeted self-help materials to prevent post-traumatic stress  
1006 disorder following childbirth. *BJOG Int J Obstet Gynaecol* 2020;127(7):886-896.  
1007 doi:10.1111/1471-0528.16163  
1008
- 1009 104. Astill Wright, L, Sijbrandij M, Sinnerton R, Lewis C, Roberts NP, Bisson JI. 2019.  
1010 Pharmacological prevention and early treatment of post-traumatic stress disorder and acute stress  
1011 disorder: a systematic review and meta-analysis. *Translational Psychiatry* 2019;9(1):334.  
1012
- 1013 105. Roberts NP, Kitchiner NJ, Kenardy J, Lewis CE, Bisson JI. Early psychological  
1014 intervention following recent trauma: a systematic review and meta-analysis. *Eur J*  
1015 *Psychotraumatology* 2019;10(1):1695486.  
1016
- 1017 106. Watkins LE, Sprang KR, Rothbaum BO. Treating PTSD: a review of evidence-based  
1018 psychotherapy interventions. *Front Behav Neurosci* 2018;12:258.  
1019
- 1020 107. Varker T, Jones KA, Arjmand HA, Hinton M, Hiles SA, Freijah I, Forbes D, Kartal D,  
1021 Phelps A, Bryant RA, McFarlane A. Dropout from guideline-recommended psychological  
1022 treatments for posttraumatic stress disorder: A systematic review and meta-analysis. *J Affect*  
1023 *Disord Rep* 2021;4:100093.  
1024
- 1025 108. Lewis C. Dropout from psychological therapies for post-traumatic stress disorder (PTSD) in  
1026 adults: systematic review and meta-analysis. *Eur J Psychotraumatology* 2020;11(1):1709709.  
1027
- 1028 109. Schottenbauer M. Nonresponse and dropout rates in outcome studies on PTSD: review and  
1029 methodological considerations. *Psychiatry* 2008;71(2):134-68.  
1030
- 1031 110. Fonzo GA, Federchenco V, Lara A. Predicting and managing treatment non-response in  
1032 posttraumatic stress disorder. *Curr Treat Options Psychiatry* 2020 Jun;7(2):70-87. doi:  
1033 10.1007/s40501-020-00203-1. PMID: 33344106; PMCID: PMC7748158.  
1034

- 1035 111. Dekel S, Gilbertson M, Orr S, Rauch S, Wood N, Pitman R. Chapter 34 - Trauma and  
1036 Posttraumatic Stress Disorder. Massachusetts Gen Hosp Compr Clin Psychiatry 2016.  
1037
- 1038 112. Koek RJ, Schwartz HN, Scully S, Langevin JP, Spangler S, Korotinsky A, Jou K, Leuchter  
1039 A. Treatment-Refractory Posttraumatic Stress Disorder (TRPTSD): a review and framework for  
1040 the future. *Prog Neuropsychopharmacol Biol Psychiatry* 2016;70:170-218. doi:  
1041 10.1016/j.pnpbp.2016.01.015. PMID: 26854815.  
1042
- 1043 113. Glazer KB, Howell EA. A way forward in the maternal mortality crisis: addressing maternal  
1044 health disparities and mental health. *Arch Womens Ment Health* 2021;24:823–830.  
1045 <https://doi.org/10.1007/s00737-021-01161-0>  
1046
- 1047 114. Joseph KS, Boutin A, Lisonkova S, Muraca GM, Razaz N, John S, Mehrabadi A, Sabr Y,  
1048 Ananth CV, Schisterman E. Maternal mortality in the United States: recent trends, current status,  
1049 and future considerations. *Obstet Gynecol* 2021;137(5):763-771. doi:  
1050 10.1097/AOG.0000000000004361. PMID: 33831914; PMCID: PMC8055191.  
1051
- 1052 115. Norhayati MN, Hazlina NN, Asrenee AR, Emilin WW. Magnitude and risk factors for  
1053 postpartum symptoms: a literature review. *J Affect Disord* 2015;175:34-52.  
1054
- 1055 116. Voit FAC, Kajantie E, Lemola S, Räikkönen K, Wolke D, Schnitzlein DD. Maternal mental  
1056 health and adverse birth outcomes. Böckerman P, ed. *PLOS ONE*. 2022;17(8):e0272210.  
1057 doi:10.1371/journal.pone.0272210  
1058
- 1059 117. Knapp M, Wong G. Economics and mental health: the current scenario. *World Psychiatry*  
1060 2020;19(1):3-14.  
1061
- 1062 118. Luca DL, Garlow N, Staatz C, Margiotta C, Zivin K. Societal costs of untreated perinatal  
1063 mood and anxiety disorders in the United States. *Mathematica* 2019 Apr: 1–4.  
1064
- 1065 119. Grekin R, O'Hara MW. Prevalence and risk factors of postpartum posttraumatic stress  
1066 disorder: a meta-analysis. *Clinic Psychol Rev* 2014;34(5):389-401.  
1067
- 1068 120. Jagodnik KM, Ein-Dor T, Chan SJ, Ashkenazy AT, Bartal A, Dekel S. Screening for post-  
1069 traumatic stress disorder following childbirth using the Peritraumatic Distress Inventory.  
1070 medRxiv 2023. doi:10.1101/2023.04.23.23288976  
1071
- 1072 121. Lang AJ. Mindfulness in PTSD treatment. *Curr Opinion Psychology* 2017;14:40-43.  
1073 <https://doi.org/10.1016/j.copsyc.2016.10.005>  
1074
- 1075 122. Bisson JI, van Gelderen M, Roberts NP, Lewis C. Non-pharmacological and non-  
1076 psychological approaches to the treatment of PTSD: results of a systematic review and meta-  
1077 analyses. *Eur J Psychotraumatology* 2020;11(1):1795361.  
1078  
1079  
1080

- 1081 123. Brown RL, Wood A, Carter JD, Kannis-Dymand L. The metacognitive model of post-  
1082 traumatic stress disorder and metacognitive therapy for post-traumatic stress disorder: A  
1083 systematic review. *Clin Psychology & Psychotherapy* 2022;29(1):131-146.  
1084 <https://doi.org/10.1002/cpp.2633>  
1085
- 1086 124. Babu MS, Chan SJ, Ein-Dor T, Dekel S. 2022. Traumatic childbirth during COVID-19  
1087 triggers maternal psychological growth and in turn better mother-infant bonding. *J Affective*  
1088 *Disord*, 313:163-166. doi:<https://doi.org/10.1016/j.jad.2022.06.076>  
1089
- 1090 125. Rashidi M, Maier E, Dekel S, et al. Peripartum effects of synthetic oxytocin: the good, the  
1091 bad, and the unknown. *Neurosci Biobehav Rev* 2022;141:104859.  
1092 doi:[10.1016/j.neubiorev.2022.104859](https://doi.org/10.1016/j.neubiorev.2022.104859)  
1093
